# Supplementary material
Source: publisher figshare collection journal article supplement (https://acs.figshare.com/ndownloader/files/10379679)
Supplement: Supplementary file 1 [file 10379679]

## Supporting Information

# Evaluation of Transport Parameters in MoS<sub>2</sub>/Graphene Junction Devices Fabricated by Chemical Vapor Deposition

*Young Chul Kim, Van Tu Nguyen, Soonil Lee, Ji-Yong Park,<sup>\*</sup> and Yeong Hwan Ahn<sup>\*</sup>*

Department of Physics and Department of Energy Systems Research, Ajou University,  
Suwon 16499, Korea

<sup>\*</sup>Electronic mail: jiyong@ajou.ac.kr (JYP); ahny@ajou.ac.kr (YHA)

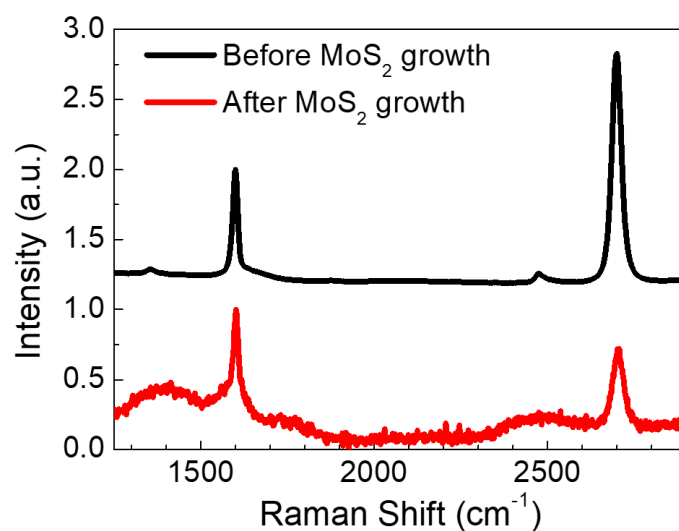

**Figure S1. Evolution of graphene Raman spectra with MoS<sub>2</sub> growth.** Raman spectra on graphene film before and after it is used as an anchor for MoS<sub>2</sub> growth. Relatively large 2D peak observed in the initial Raman spectrum confirms that it is a single-layer graphene. Conversely, after the MoS<sub>2</sub> growth, the relative strength of 2D peak decreases. In addition the D peak is not clearly resolved after the growth.

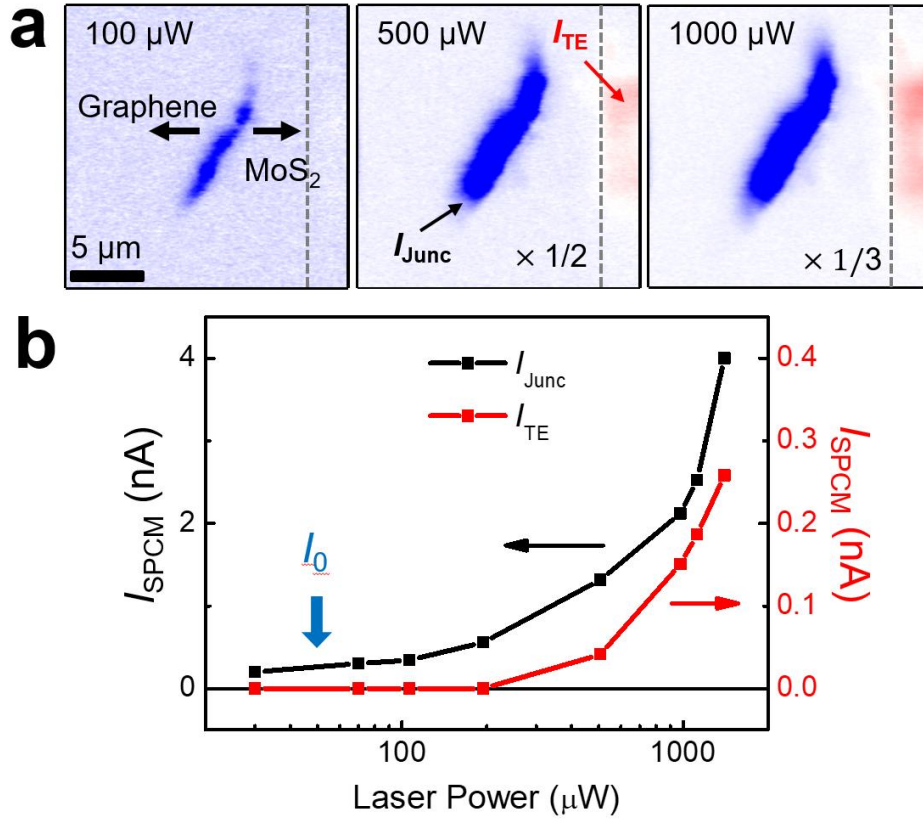

**Figure S2. Laser power dependence and thermoelectric current.** (a) A series of SPCM images for the three different laser power conditions (100, 500, and 1000  $\mu\text{W}$ ). The photocurrent at the junction region ( $I_{\text{Junc}}$ ) dominate the SPCM signals at low power condition, whereas the thermoelectric current ( $I_{\text{TE}}$ ) appears when we illuminate metal electrode with relatively high laser power. (b) Plot of  $I_{\text{Junc}}$  and  $I_{\text{TE}}$  as a function of laser power.  $I_0$  ( $\sim 50$   $\mu\text{W}$ ) indicates the typical laser power condition used in the main manuscript. At the low power regime,  $I_{\text{Junc}}$  dominate the SPCM signal because  $I_{\text{TE}}$  increases nonlinearly with the laser power, whereas  $I_{\text{Junc}}$  increases linearly with the laser power.

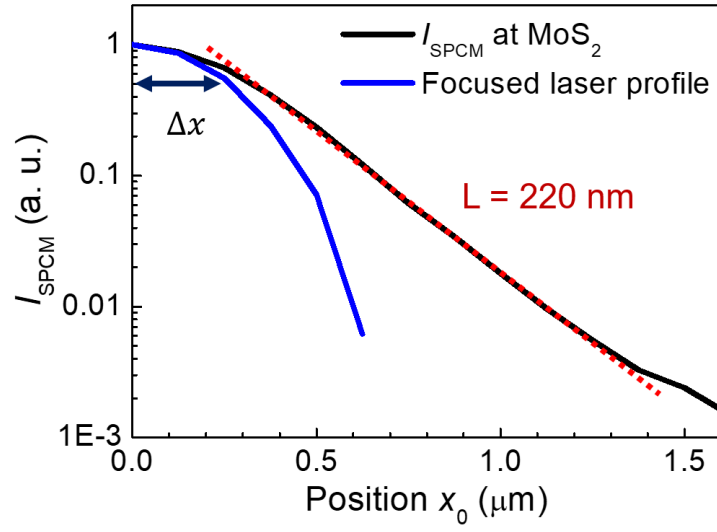

**Figure S3. MoS<sub>2</sub> diffusion length vs focused laser beam profile  $I_{\text{SPCM}}$**  is plotted as a function of the laser position ( $x_0$ ) in the MoS<sub>2</sub> region (black line). The red dotted line is fit to the data. Shown together as blue solid line is the focused beam profile measured from the reflection image. We obtained the MoS<sub>2</sub> diffusion length by fitting the data away from the junction area, in which  $I_{\text{SPCM}}$  exhibit a simple exponential decay.
